# Supplementary material
Source: PubMed Central journal article supplement (PMC6696872)
Supplement: Online_Supplement_for_MCAT-N.pdf [file Online_Supplement_for_MCAT-N.pdf]

## Online Supplement

A1. Bias and RMSE for the latent trait estimates, and test reliability of the various item selection methods using the fixed-length termination rule

| Length | $\rho_{\theta_1, \theta_2}$ | Method | Bias       |            | MSE        |            | Reliability |            |
|--------|-----------------------------|--------|------------|------------|------------|------------|-------------|------------|
|        |                             |        | $\theta_1$ | $\theta_2$ | $\theta_1$ | $\theta_2$ | $\theta_1$  | $\theta_2$ |
| 20     | 0                           | RS     | -0.074     | -0.065     | 0.462      | 0.434      | 0.61        | 0.62       |
|        |                             | FI     | -0.033     | -0.026     | 0.195      | 0.181      | 0.84        | 0.85       |
|        |                             | KL     | -0.059     | -0.050     | 0.258      | 0.232      | 0.81        | 0.81       |
|        |                             | MI     | -0.027     | -0.028     | 0.190      | 0.182      | 0.84        | 0.85       |
|        | 0.3                         | RS     | -0.068     | -0.059     | 0.392      | 0.383      | 0.65        | 0.66       |
|        |                             | FI     | -0.024     | -0.029     | 0.170      | 0.173      | 0.85        | 0.85       |
|        |                             | KL     | -0.042     | -0.044     | 0.211      | 0.205      | 0.83        | 0.83       |
|        |                             | MI     | -0.021     | -0.026     | 0.167      | 0.167      | 0.85        | 0.85       |
|        | 0.6                         | RS     | -0.055     | -0.053     | 0.307      | 0.299      | 0.71        | 0.72       |
|        |                             | FI     | -0.018     | -0.018     | 0.151      | 0.152      | 0.87        | 0.87       |
|        |                             | KL     | -0.028     | -0.031     | 0.171      | 0.164      | 0.85        | 0.86       |
|        |                             | MI     | -0.017     | -0.017     | 0.150      | 0.151      | 0.86        | 0.87       |
|        | 0.9                         | RS     | -0.029     | -0.033     | 0.202      | 0.206      | 0.81        | 0.81       |
|        |                             | FI     | -0.014     | -0.017     | 0.101      | 0.101      | 0.90        | 0.91       |
|        |                             | KL     | -0.018     | -0.020     | 0.105      | 0.102      | 0.90        | 0.91       |
|        |                             | MI     | -0.014     | -0.017     | 0.101      | 0.101      | 0.90        | 0.91       |
| 60     | 0                           | RS     | -0.056     | -0.045     | 0.244      | 0.214      | 0.80        | 0.81       |
|        |                             | FI     | -0.026     | -0.018     | 0.097      | 0.087      | 0.92        | 0.92       |
|        |                             | KL     | -0.036     | -0.026     | 0.123      | 0.112      | 0.91        | 0.91       |
|        |                             | MI     | -0.025     | -0.018     | 0.096      | 0.087      | 0.92        | 0.92       |
|        | 0.3                         | RS     | -0.046     | -0.037     | 0.211      | 0.198      | 0.82        | 0.83       |
|        |                             | FI     | -0.017     | -0.018     | 0.089      | 0.082      | 0.92        | 0.93       |
|        |                             | KL     | -0.024     | -0.026     | 0.104      | 0.100      | 0.91        | 0.92       |
|        |                             | MI     | -0.015     | -0.018     | 0.086      | 0.081      | 0.92        | 0.93       |
|        | 0.6                         | RS     | -0.034     | -0.037     | 0.167      | 0.162      | 0.85        | 0.85       |
|        |                             | FI     | -0.012     | -0.014     | 0.078      | 0.074      | 0.93        | 0.93       |
|        |                             | KL     | -0.017     | -0.020     | 0.086      | 0.081      | 0.92        | 0.93       |
|        |                             | MI     | -0.012     | -0.014     | 0.078      | 0.074      | 0.93        | 0.93       |
|        | 0.9                         | RS     | -0.017     | -0.018     | 0.100      | 0.100      | 0.90        | 0.91       |
|        |                             | FI     | -0.010     | -0.010     | 0.054      | 0.053      | 0.95        | 0.95       |
|        |                             | KL     | -0.011     | -0.011     | 0.055      | 0.053      | 0.95        | 0.95       |
|        |                             | MI     | -0.010     | -0.010     | 0.054      | 0.052      | 0.95        | 0.95       |

*Note.*  $\rho_{\theta_1, \theta_2}$  = correlation between  $\theta_1$  and  $\theta_2$ ; RS = random selection; FI = Fisher information matrix; KL = Kullback-Leibler information; MI = mutual information; MSE = mean squared error.

A2: Bias and MSE for latent trait estimates, test reliability, TLS, and %ETA of various item selection methods using the fixed-precision termination rule

| SE   | $\rho_{\theta_1, \theta_2}$ | Method | Bias       |            | MSE        |            | Reliability |            | TLS   |      |     |     | %ETA |
|------|-----------------------------|--------|------------|------------|------------|------------|-------------|------------|-------|------|-----|-----|------|
|      |                             |        | $\theta_1$ | $\theta_2$ | $\theta_1$ | $\theta_2$ | $\theta_1$  | $\theta_2$ | Mean  | SD   | Min | Max |      |
| 0.55 | 0                           | RS     | -0.065     | -0.062     | 0.288      | 0.276      | 0.77        | 0.78       | 52.1  | 35.2 | 15  | 387 | 0.3  |
|      |                             | FI     | -0.039     | -0.033     | 0.317      | 0.303      | 0.75        | 0.75       | 10.8  | 9.2  | 7   | 304 | 0.2  |
|      |                             | KL     | -0.056     | -0.060     | 0.275      | 0.270      | 0.81        | 0.81       | 25.8  | 28.9 | 7   | 380 | 0.3  |
|      |                             | MI     | -0.027     | -0.038     | 0.300      | 0.309      | 0.75        | 0.76       | 11.6  | 10.8 | 6   | 265 | 0.3  |
|      | 0.3                         | RS     | -0.063     | -0.051     | 0.290      | 0.274      | 0.76        | 0.77       | 41.0  | 22.4 | 9   | 322 | 0.0  |
|      |                             | FI     | -0.036     | -0.033     | 0.304      | 0.307      | 0.74        | 0.74       | 9.0   | 4.6  | 6   | 259 | 0.0  |
|      |                             | KL     | -0.048     | -0.054     | 0.262      | 0.271      | 0.79        | 0.79       | 18.0  | 16.4 | 7   | 284 | 0.0  |
|      |                             | MI     | -0.032     | -0.030     | 0.292      | 0.304      | 0.74        | 0.74       | 9.4   | 4.7  | 6   | 182 | 0.0  |
|      | 0.6                         | RS     | -0.047     | -0.041     | 0.286      | 0.280      | 0.74        | 0.75       | 24.7  | 9.8  | 8   | 169 | 0.0  |
|      |                             | FI     | -0.018     | -0.023     | 0.302      | 0.313      | 0.74        | 0.73       | 6.8   | 1.2  | 5   | 18  | 0.0  |
|      |                             | KL     | -0.037     | -0.048     | 0.274      | 0.275      | 0.77        | 0.77       | 9.8   | 4.7  | 5   | 67  | 0.0  |
|      |                             | MI     | -0.024     | -0.034     | 0.301      | 0.309      | 0.73        | 0.73       | 6.9   | 1.3  | 5   | 19  | 0.0  |
| 0.9  | RS                          | -0.026 | -0.032     | 0.291      | 0.293      | 0.72       | 0.73        | 11.2       | 4.3   | 3    | 77  | 0.0 |      |
|      | FI                          | -0.030 | -0.034     | 0.296      | 0.306      | 0.74       | 0.73        | 4.0        | 0.7   | 3    | 6   | 0.0 |      |
|      | KL                          | -0.046 | -0.052     | 0.295      | 0.300      | 0.74       | 0.73        | 4.3        | 0.8   | 3    | 7   | 0.0 |      |
|      | MI                          | -0.028 | -0.036     | 0.296      | 0.297      | 0.74       | 0.74        | 4.2        | 0.6   | 4    | 7   | 0.0 |      |
| 0.32 | 0                           | RS     | -0.029     | -0.027     | 0.093      | 0.090      | 0.92        | 0.93       | 183.2 | 72.9 | 71  | 399 | 12.1 |
|      |                             | FI     | -0.023     | -0.019     | 0.097      | 0.092      | 0.92        | 0.92       | 63.1  | 47.9 | 29  | 388 | 12.0 |
|      |                             | KL     | -0.028     | -0.022     | 0.090      | 0.085      | 0.93        | 0.93       | 95.7  | 71.8 | 30  | 399 | 12.2 |
|      |                             | MI     | -0.025     | 0.040      | 0.132      | 0.411      | 0.91        | 0.91       | 64.4  | 51.1 | 29  | 398 | 11.7 |
|      | 0.3                         | RS     | -0.023     | -0.026     | 0.091      | 0.086      | 0.92        | 0.92       | 174.7 | 70.3 | 72  | 399 | 7.5  |
|      |                             | FI     | -0.019     | -0.019     | 0.095      | 0.093      | 0.92        | 0.92       | 58.4  | 43.3 | 28  | 382 | 7.4  |
|      |                             | KL     | -0.025     | -0.020     | 0.087      | 0.085      | 0.92        | 0.93       | 87.3  | 65.8 | 29  | 399 | 7.6  |
|      |                             | MI     | -0.020     | 0.043      | 0.114      | 0.358      | 0.91        | 0.91       | 58.2  | 43.4 | 28  | 388 | 7.8  |
|      | 0.6                         | RS     | -0.024     | -0.018     | 0.095      | 0.086      | 0.91        | 0.92       | 144.8 | 59.4 | 65  | 399 | 1.9  |
|      |                             | FI     | -0.016     | -0.013     | 0.099      | 0.094      | 0.91        | 0.91       | 45.4  | 30.7 | 26  | 389 | 1.8  |
|      |                             | KL     | -0.020     | -0.018     | 0.091      | 0.087      | 0.92        | 0.92       | 64.8  | 48.4 | 26  | 399 | 1.9  |
|      |                             | MI     | -0.015     | 0.022      | 0.103      | 0.232      | 0.91        | 0.91       | 44.1  | 26.5 | 26  | 377 | 3.0  |
|      | 0.9                         | RS     | -0.016     | -0.021     | 0.100      | 0.097      | 0.90        | 0.91       | 61.2  | 27.2 | 31  | 398 | 0.1  |
|      |                             | FI     | -0.015     | -0.017     | 0.103      | 0.102      | 0.90        | 0.90       | 20.2  | 8.9  | 15  | 288 | 0.1  |
|      |                             | KL     | -0.015     | -0.018     | 0.100      | 0.098      | 0.91        | 0.91       | 22.4  | 9.9  | 16  | 299 | 0.1  |
|      |                             | MI     | -0.012     | -0.012     | 0.105      | 0.111      | 0.90        | 0.90       | 20.1  | 7.9  | 15  | 314 | 0.3  |

Note. SE = standard error of  $\theta_1$  and  $\theta_2$ ;  $\rho_{\theta_1, \theta_2}$  = correlation between  $\theta_1$  and  $\theta_2$ ; RS = random selection; FI = Fisher information matrix; KL = Kullback-Leibler information; MI = mutual information; MSE = mean squared error; TLS = test length that examinees required to stop the tests when their latent traits' precision met the requirement; %ETA = percentage of examinees taking all items in the item bank.
